# Supplementary material for: Infection-derived lipids elicit an immune deficiency circuit in arthropods
Source: PubMed Central journal article supplement (PMC5316886; doi:10.1038/ncomms14401), 2017-02-14
Supplement: ncomms14401-s1.pdf [file ncomms14401-s1.pdf]

Citrate buffer      Acetate buffer      MES buffer  
pH 4.0   pH 4.5   pH 5.0   pH 5.5   pH 6.0   pH 6.5  
 Ins. Sol.   Ins. Sol.   Ins. Sol.   Ins. Sol.   Ins. Sol.   Ins. Sol.

HEPES buffer      Tris-base buffer      TAPS buffer      Glycine buffer  
pH 7.0   pH 7.5   pH 8.0   pH 8.5   pH 9.0   pH 9.5   pH 10  
 Ins. Sol.   Ins. Sol.   Ins. Sol.   Ins. Sol.   Ins. Sol.   Ins. Sol.   Ins. Sol.

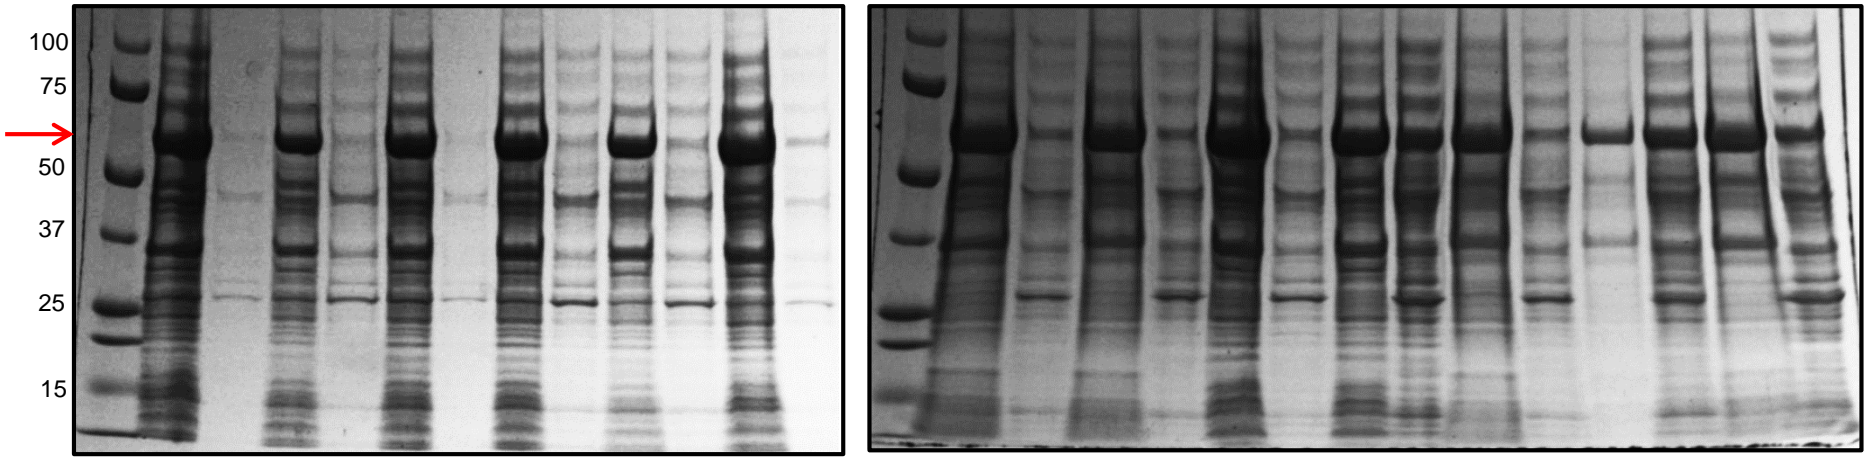

**Supplementary Figure 1 (Related to Figure 1). XIAP protein expression in *E. coli*.** *E. coli* was grown overnight in LB medium and induced at 20°C in the presence of 0.1 mM IPTG. *E. coli* was lysed (buffers pH 4-10, as indicated) and separated by centrifugation to determine protein solubility. Ins – Insoluble; Sol – Soluble.

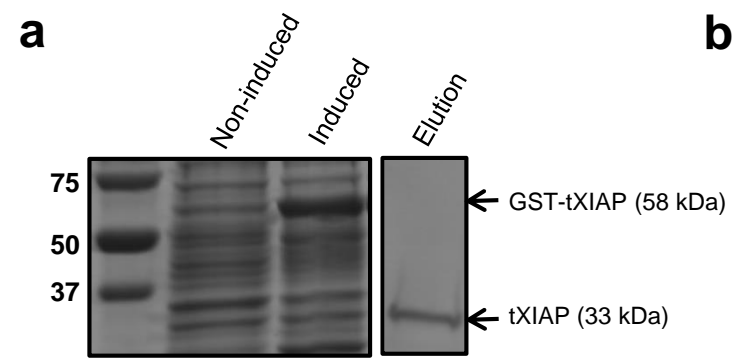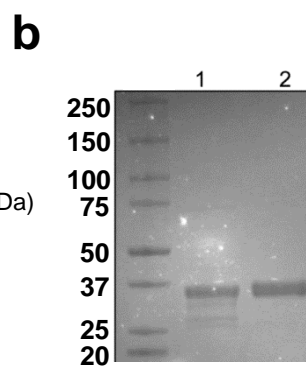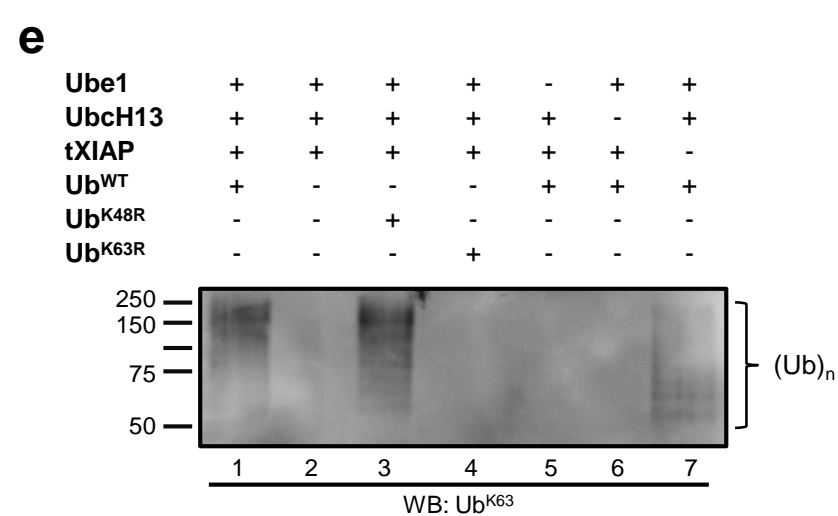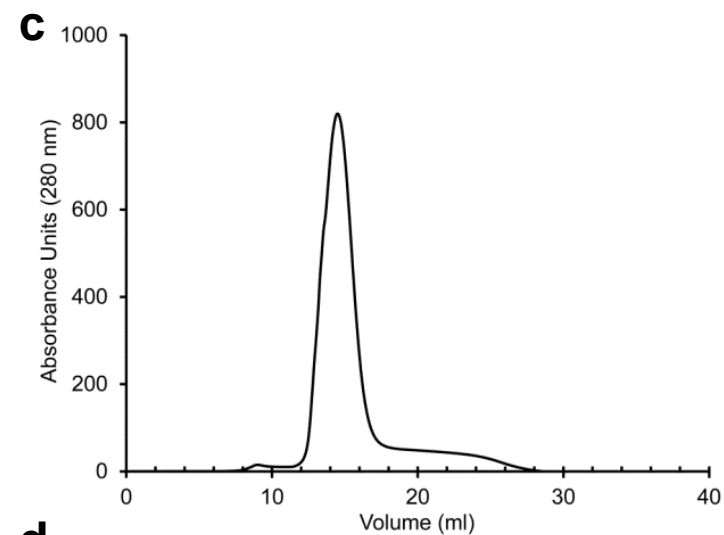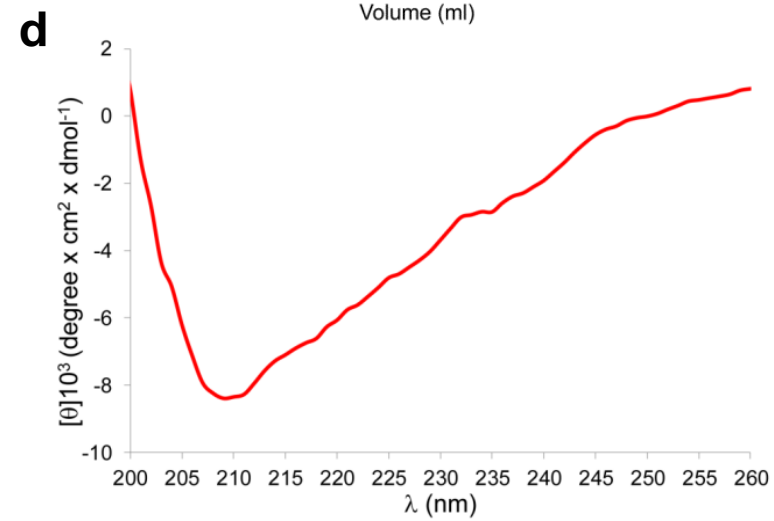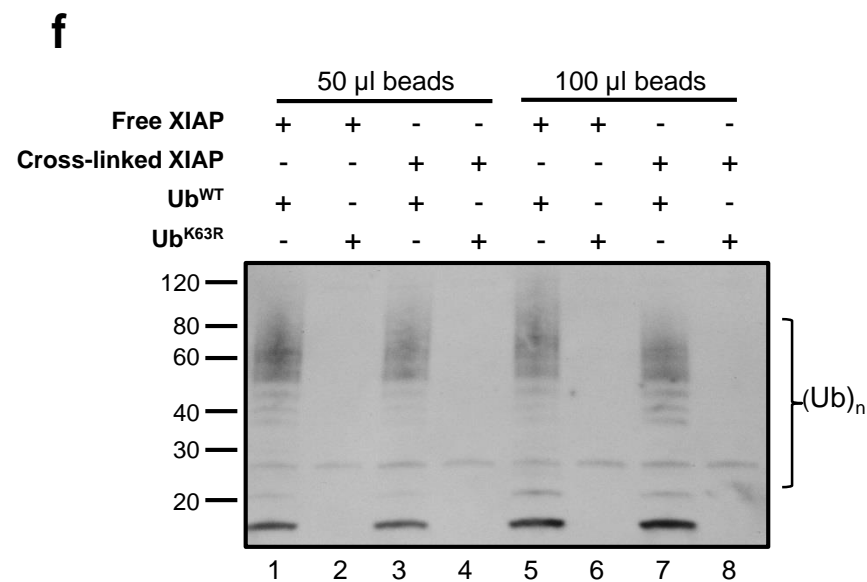

**Supplementary Figure 2 (Related to Figure 1). *I. scapularis* produces K63-linked polyubiquitin chains** (a) The *I. scapularis* XIAP protein fused to the GST-tag (GST-tXIAP) was induced following *E. coli* growth overnight. The GST tag was removed and XIAP was eluted. (b) XIAP was expressed and lysed in Tris-EDTA buffer (pH 8.9), purified using an agarose column following GST tag removal with the “PreScission” protease (1) and size exclusion in the FPLC instrument (2). (c) Elution peaked with the retention time of 18 minutes. (d) Verification of the XIAP secondary structure by circular dichroism. (e) XIAP polyubiquitylation assays in the presence (Lane 1) or absence (Lane 2) of wild-type ubiquitin (Ub<sup>WT</sup>), ubiquitin carrying a lysine to arginine mutation in the position 48 (Ub<sup>K48R</sup>) (Lane 3), ubiquitin carrying a lysine to arginine mutation in the position 63 (Ub<sup>K63R</sup>) (Lane 4). Assays were also performed in the absence of E1 (Ube1) (Lane 5), E2 (UbcH13) (Lane 6) or XIAP (Lane 7), respectively. Aliquots were resolved in 12% SDS-PAGE and then probed against Ub<sup>K63</sup>-specific antibodies (WB: UB<sup>K63</sup>). (f) Assays showing K63-polyubiquitylation in free (Lanes 1-2, 5-6) and covalently-linked XIAP-GST (Lanes 3-4, 7-8) bound to glutathione-agarose columns.

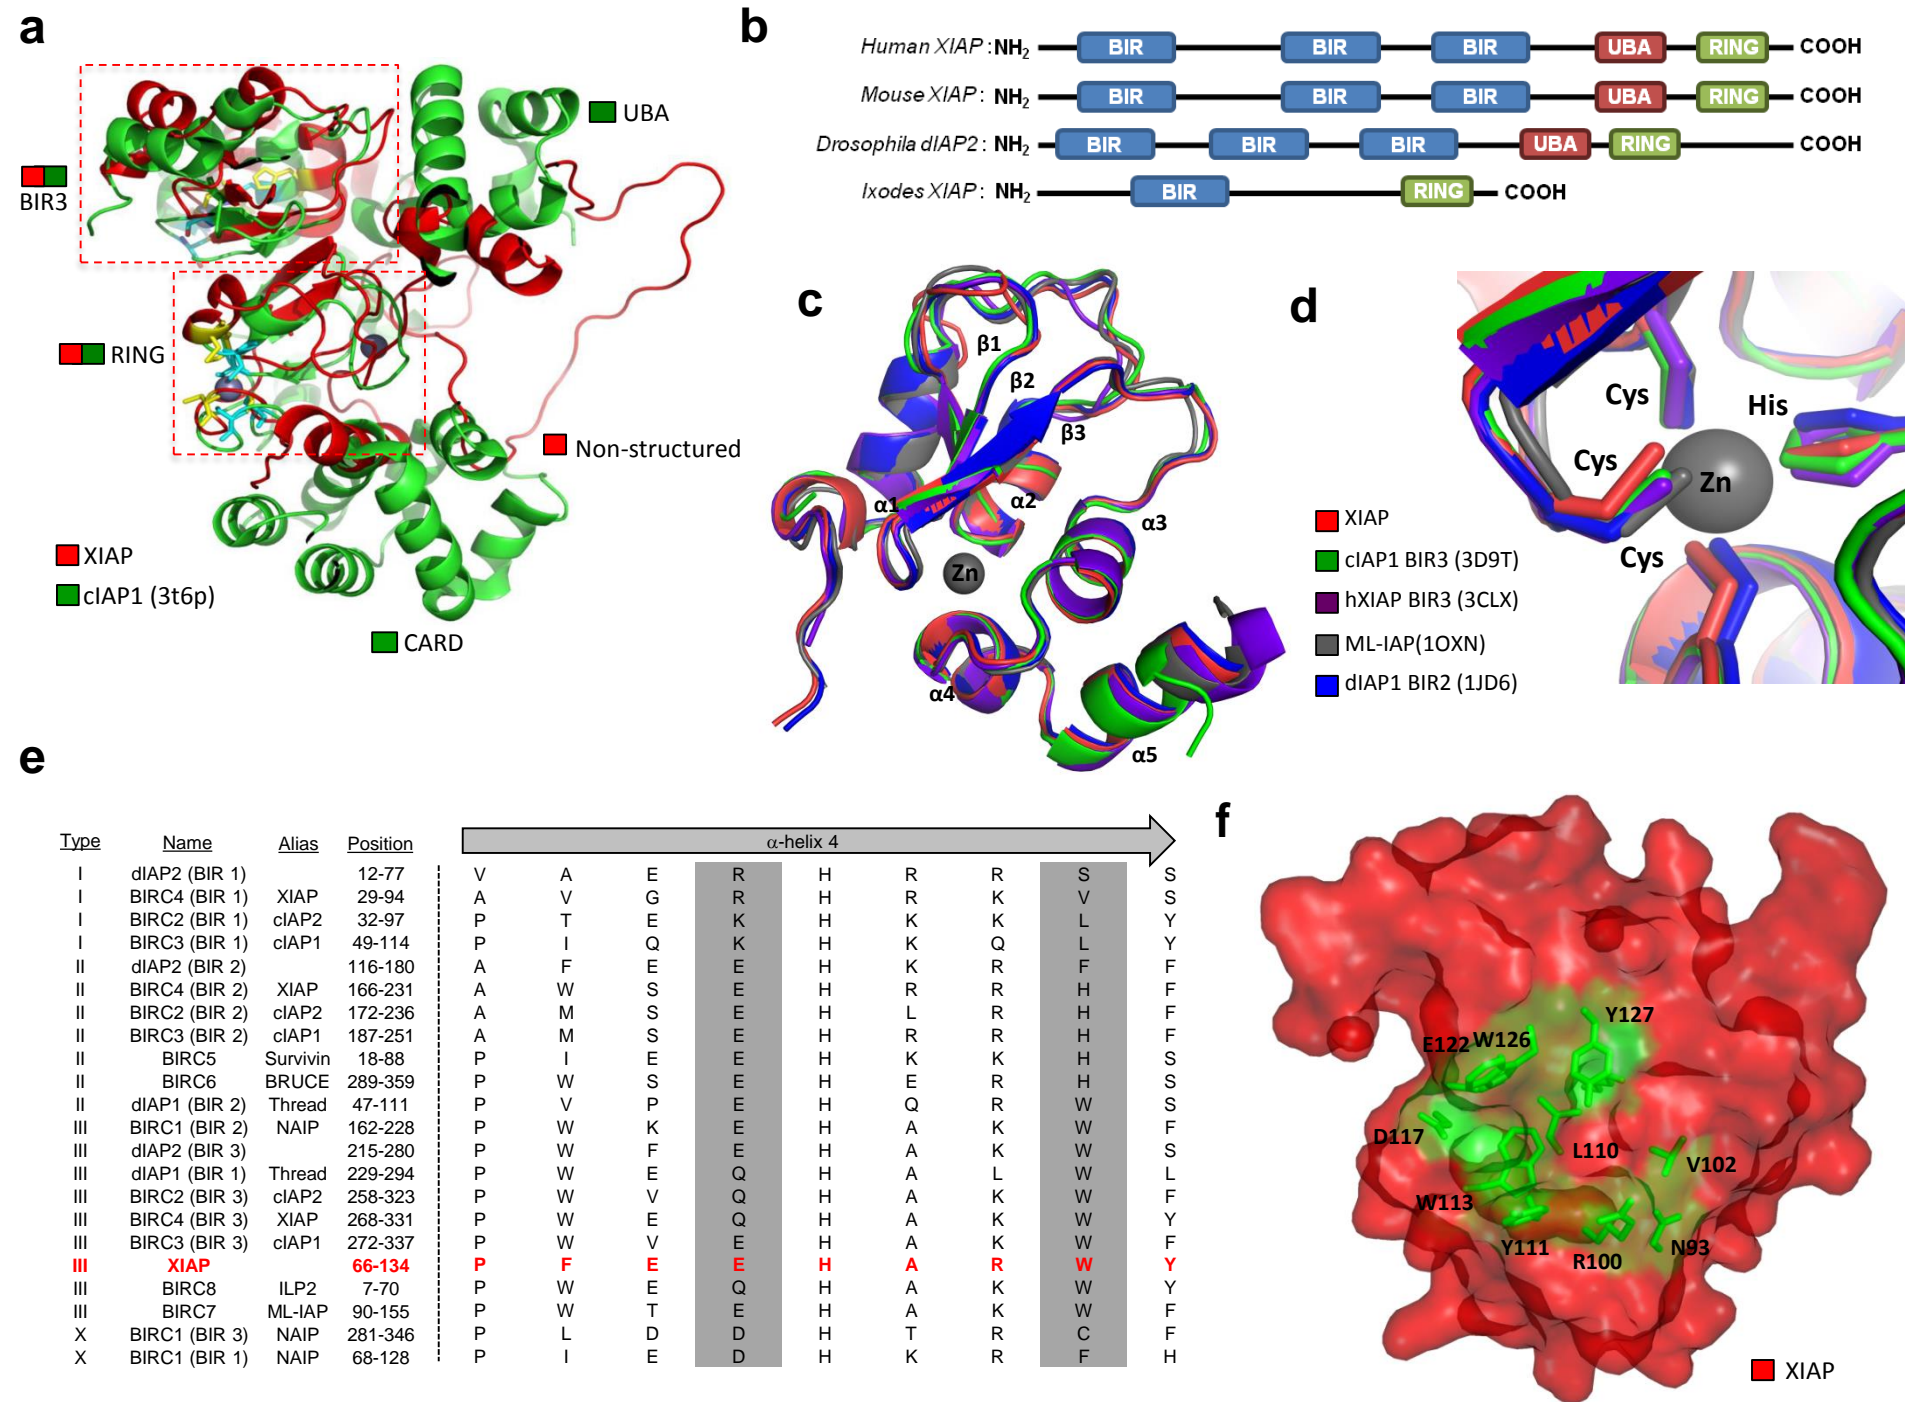

**Supplementary Figure 3 (Related to Figure 1). *I. scapularis* XIAP tertiary structure.** (a) Thread of XIAP onto the cIAP1 structure (PDB:3T6P), depicting the conserved BIR and RING domains (dashed red lines). The BIR and RING structures of XIAP highlights one and two zinc molecules with side chains in stick representation. Cyan and yellow side chains represent conserved amino acids that are involved in Zn atom coordination. The superimposition of cIAP1 (green) shows the absence of a known CARD or UBA domain in the *I. scapularis* XIAP protein (red). A non-structured region in XIAP is also shown. (b) *I. scapularis* XIAP domain comparison with human XIAP, mouse XIAP and *Drosophila* dIAP2. Baculoviral IAP repeat domain (BIR; blue), ubiquitin associated domain (UBA; red) and Really Interesting New Gene domain (RING; green) (c) Cartoon depiction of the least squares structural alignment of the tick XIAP (tXIAP) BIR domain and proteins identified from the Dali server: (1) cIAP1 BIR3 (PDB:3D9T); (2) human XIAP (hXIAP) BIR3 (PDB:3CLX); (3) ML-IAP (PDB:1OXN); (4) dIAP1 BIR2 (PDB:1JD6). (d) Conserved Zinc (Zn) coordinating residues in the XIAP BIR domain are shown. (e) Alignment of human and *Drosophila* IAP BIR domains showing the residues that depict the IBM groove (grey residues) when compared to tick XIAP (highlighted in bold red). The type and position of BIR domains at indicated proteins are also shown. (f) Surface rendition of the modeled *I. scapularis* XIAP BIR domain. The tick XIAP BIR model depicting the peptide binding pocket is displayed in green with the side chains in stick representation. See also Supplementary Figures 1-2.

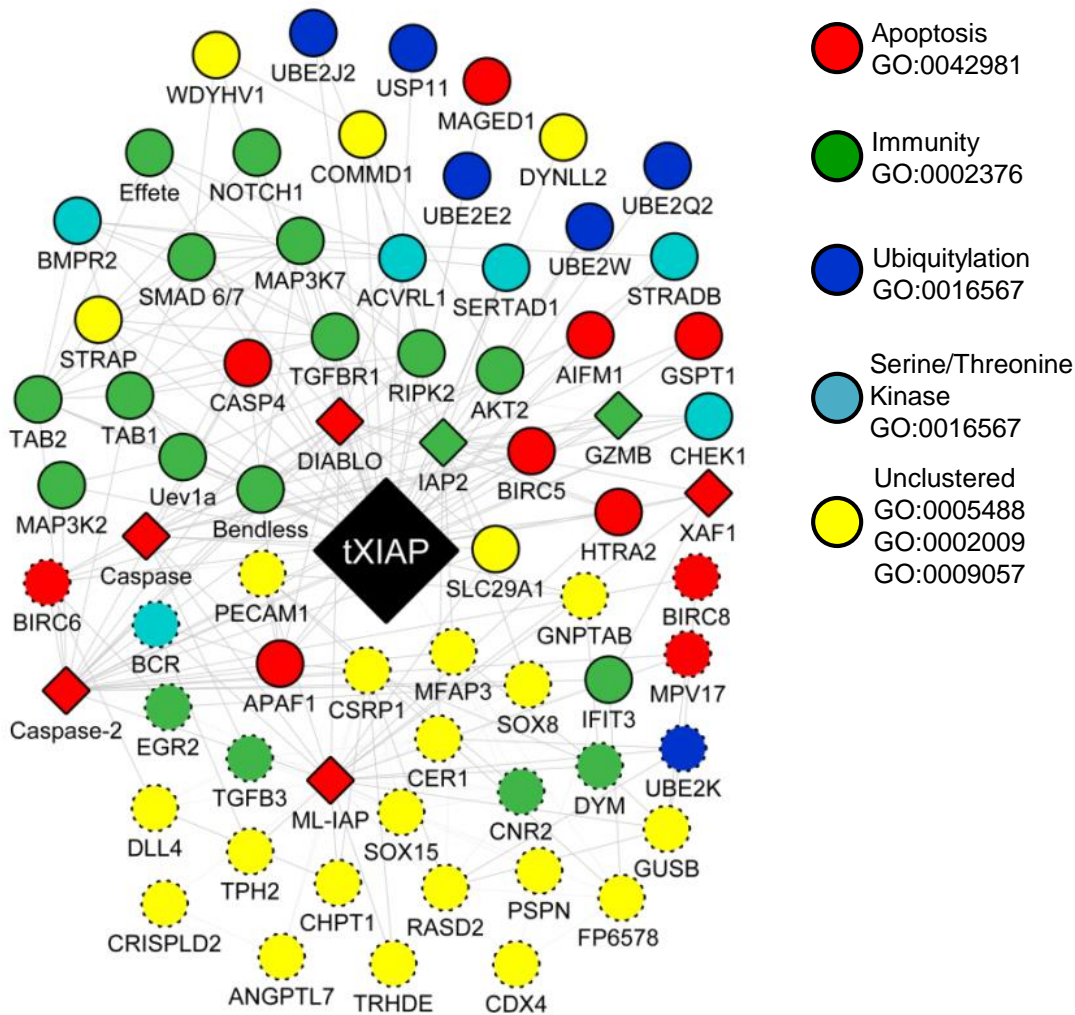

**Supplementary Figure 4 (Related to Figure 1 and Supplementary Table 1). Extended *I. scapularis* XIAP interactome.** Human XIAP or ML-IAP interactome was compiled according to GeneMANIA and Cytoscape. *I. scapularis* homologues were obtained based on PSI-BLAST and GeneCard searches. Sixty eight candidates were grouped according to the GO functional categories available at DAVID. Circles carrying solid and dotted borders indicate candidates originated from either the human XIAP or ML-IAP query, respectively. Diamond nodes indicate human homologue proteins common to both interactomes.

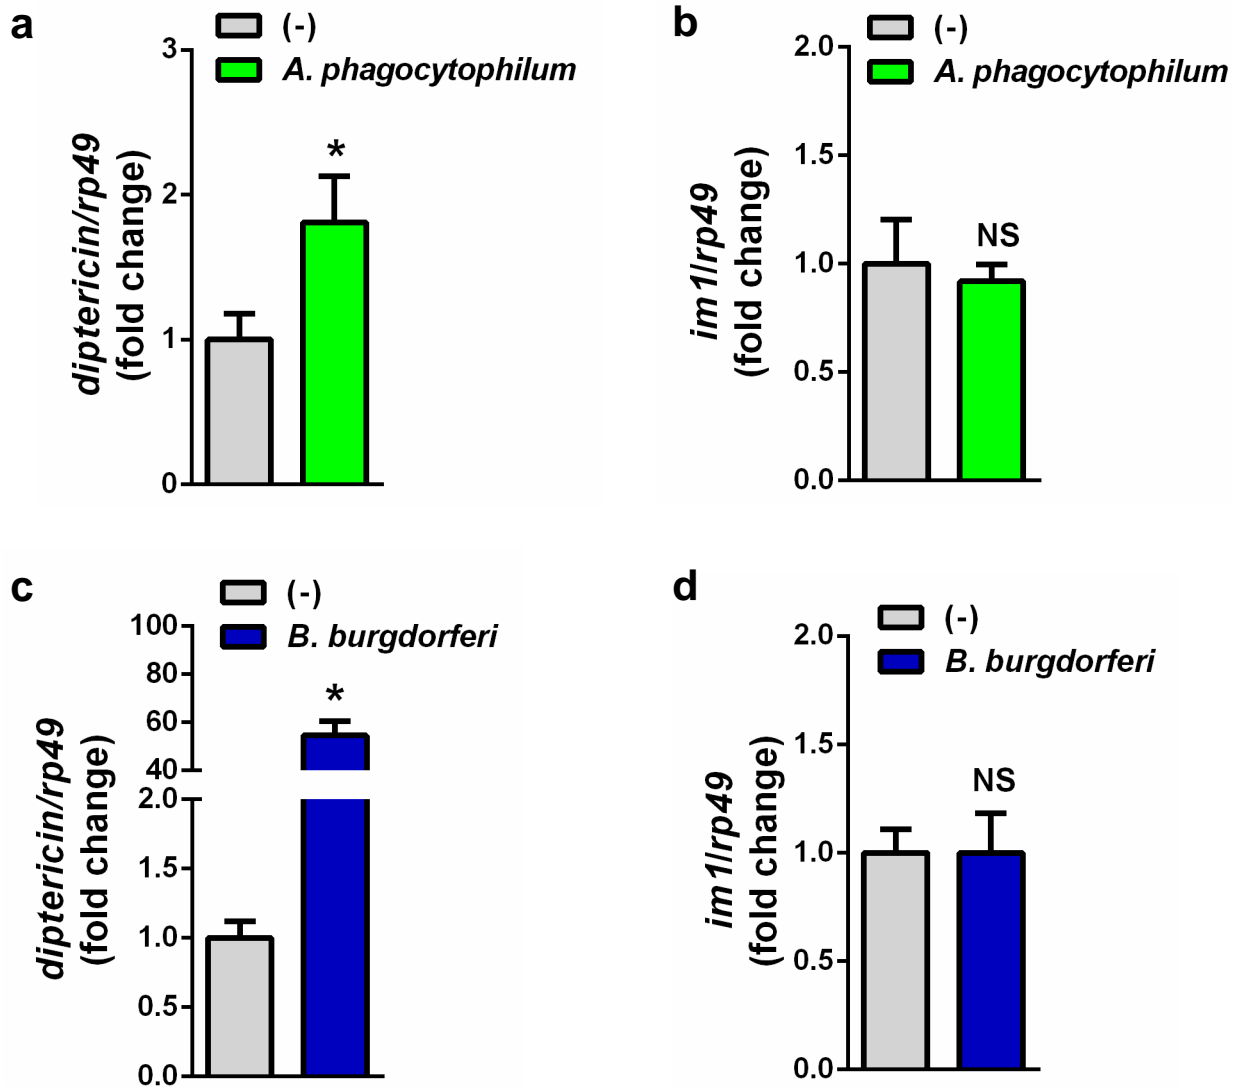

**Supplementary Figure 5 (Related to Figure 5 and Supplementary Table 2). *B. burgdorferi* and *A. phagocytophilum* elicit the IMD pathway in *Drosophila*.** Triplicate samples of  $1 \times 10^6$  S2\* cells were primed with ecdysone ( $1 \mu\text{M}$ ) and infected with (a-b) *A. phagocytophilum* or (c-d) *B. burgdorferi* at MOI 50. Pathway stimulation was measured by quantifying *diptericin* (IMD) and *im1* (Toll) transcripts. Three biological replicates and two technical replicates are represented as the mean  $\pm$  standard errors of the means (SEM). Student's t test. \* $P < 0.05$ . NS – not significant. (-), non-stimulated.

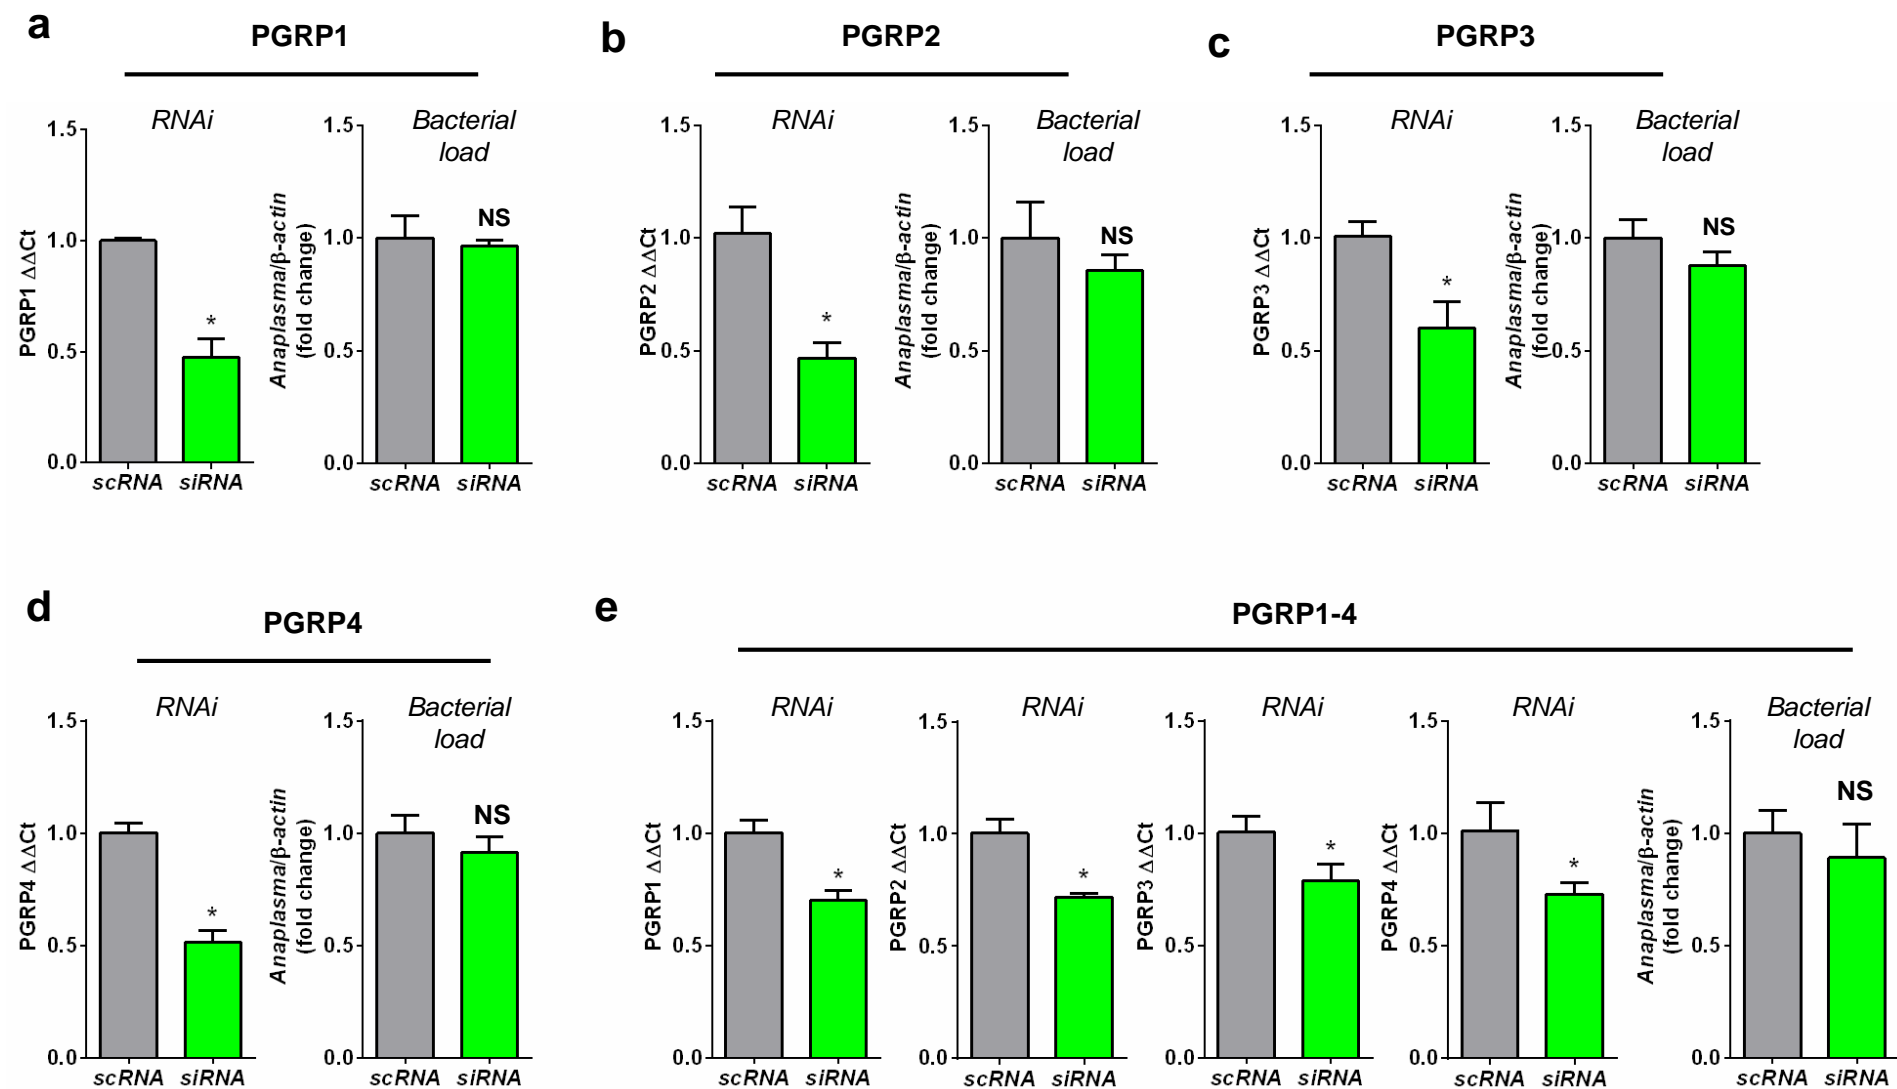

**Supplementary Figure 6 (Related to Figure 6 and Supplementary Tables 2 and 3). Soluble *I. scapularis* PGRPs do not impact the IMD pathway during *A. phagocytophilum* infection.** (a-d) Five replicates of ISE6 ( $1 \times 10^5$ ) cells were infected with *A. phagocytophilum* (MOI 50) following targeted gene silencing of (a) PGRP-1 (b) PGRP-2 (c) PGRP-3 (d) PGRP-4 and (e) PGRP-1-4. Gene silencing and *A. phagocytophilum* load (16s rDNA) were measured by qRT-PCR at 18 hours post-infection in ISE6 cells. Three biological replicates and two technical replicates are represented as the mean  $\pm$  standard errors of the means (SEM). Student's t test. \* $P < 0.05$ . scRNA – scrambled RNA; siRNA – small interference RNA. See also Supplementary Table 2.



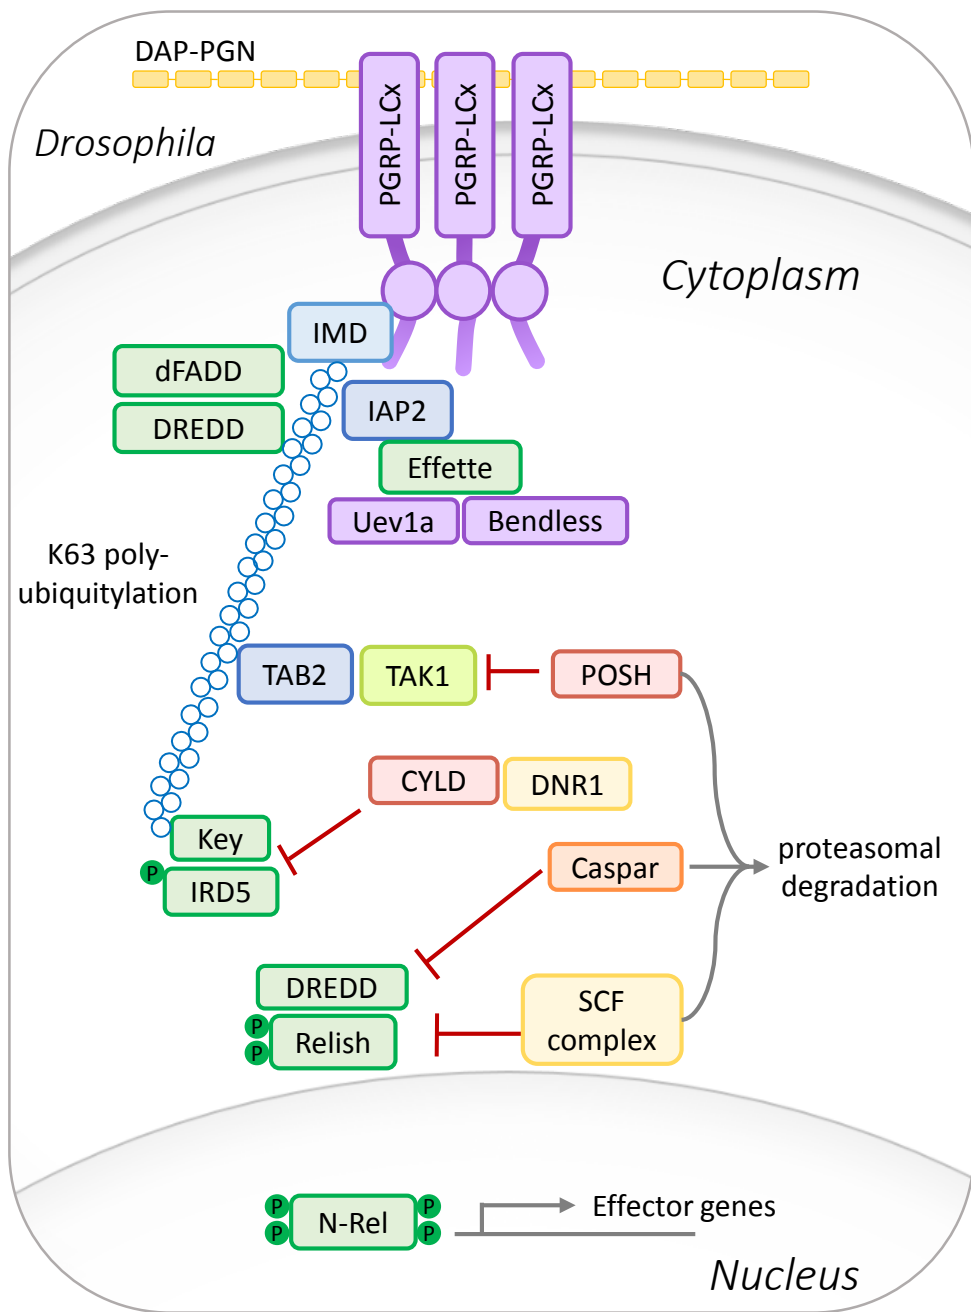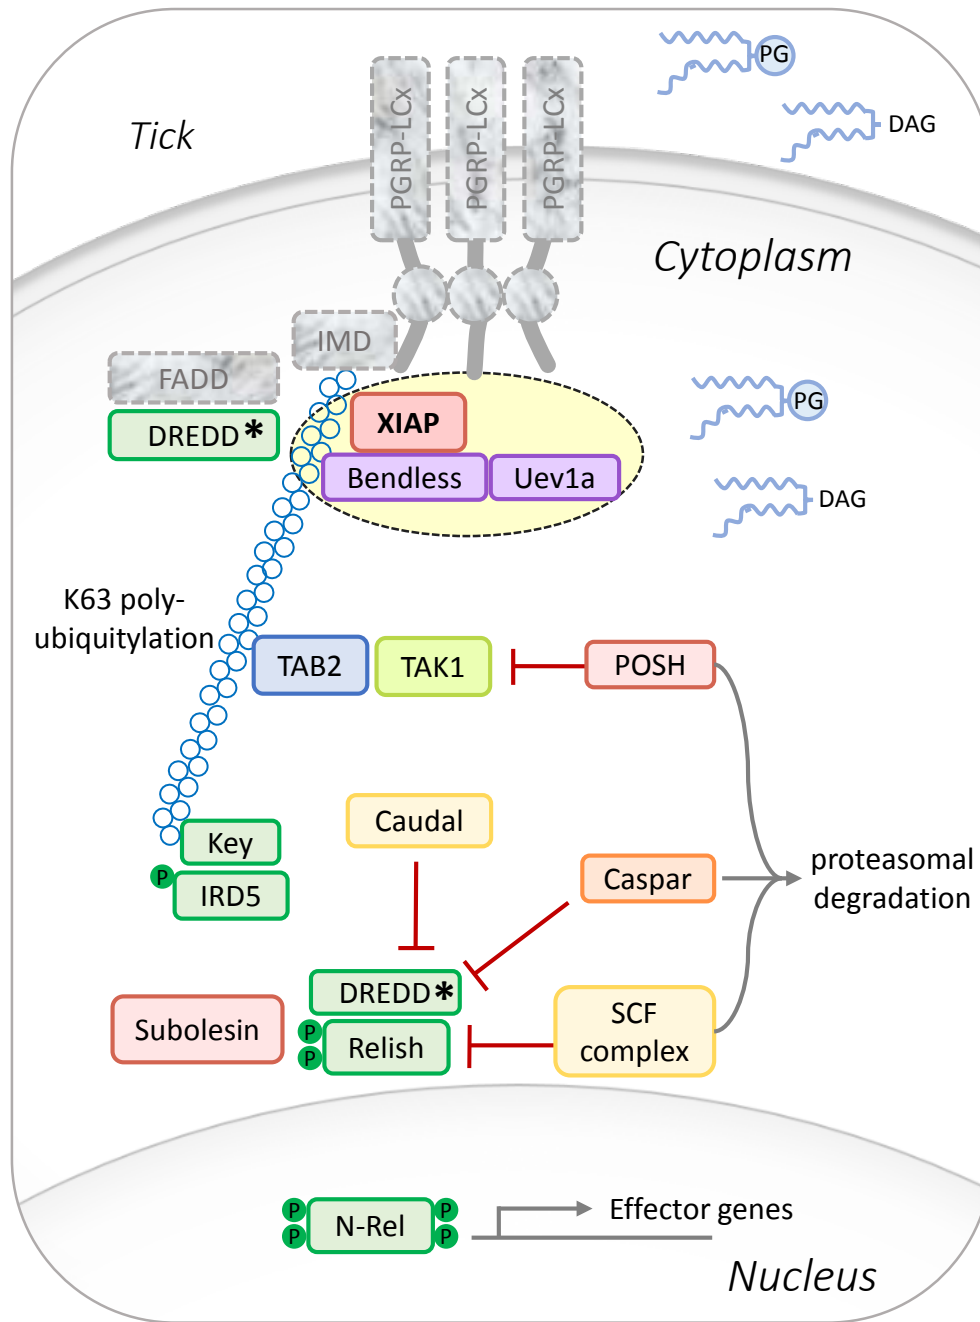

**Supplementary Figure 7 (Related to Figure 7). Schematic representation of the tick IMD pathway when compared to insects** (a) The insect IMD pathway senses and binds DAP-type peptidoglycan from Gram-negative bacteria via peptidoglycan recognition proteins LC (PGRP-LC) and PGRP-LE. Adapter molecules IMD and Fas-Associated protein with Death Domain (FADD) are recruited to the RHIM domains of PGRP-LC and engage the caspase-8 homologue DREDD. DREDD cleaves IMD, exposing a lysine (K)63-polyubiquitylation binding site. The E3 ubiquitin ligase Inhibitor of Apoptosis Protein (IAP)2 together with three E2 ubiquitin conjugating enzymes, Uev1a, Bendless and Effete, poly-ubiquitylate IMD. The ubiquitin scaffold leads to the recruitment of TGF- $\beta$  (TAK1) and Tak1-binding protein 2 (TAB2) and the I- $\kappa$ B kinase (IKK) complex, which phosphorylates the NF- $\kappa$ B transcription factor, Relish. Upon phosphorylation, the N-terminal domain of Relish (N-Rel) is cleaved by DREDD and is translocated to the nucleus, driving the production of anti-microbial peptides. (b) Multiple homologues associated with this pathway are found in ticks. However, notable exceptions include transmembrane PGRP-LC, IMD and FADD. \*the presence of DREDD has not been demonstrated in ticks; however, other caspases are available in the *I. scapularis* genome. The location of either POPG or PODAG during stimulation is unknown. XIAP-Bendless interaction is highlighted in yellow and dotted lines. Faded molecules in the IMD pathway have not been identified in the *I. scapularis* genome.

## Bendless ( $\mu\text{g}$ )

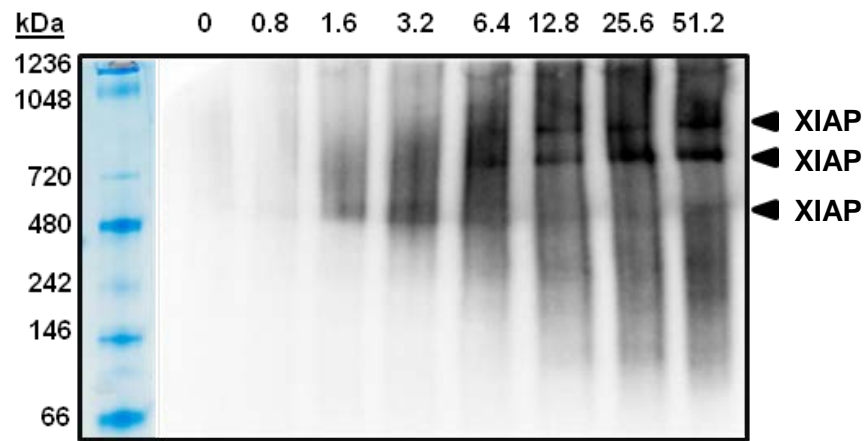

### Supplementary Figure 8 (Related to Figure 2c).

#### Uncropped Western blot of XIAP gel-shift assay.

Native gel analysis of a fixed amount of recombinant (0.2  $\mu\text{g}$ ) XIAP incubated with increasing amounts of recombinant Bendless. Immunoblotted (WB) with anti-XIAP. The WB shown is one of two biological replicates.

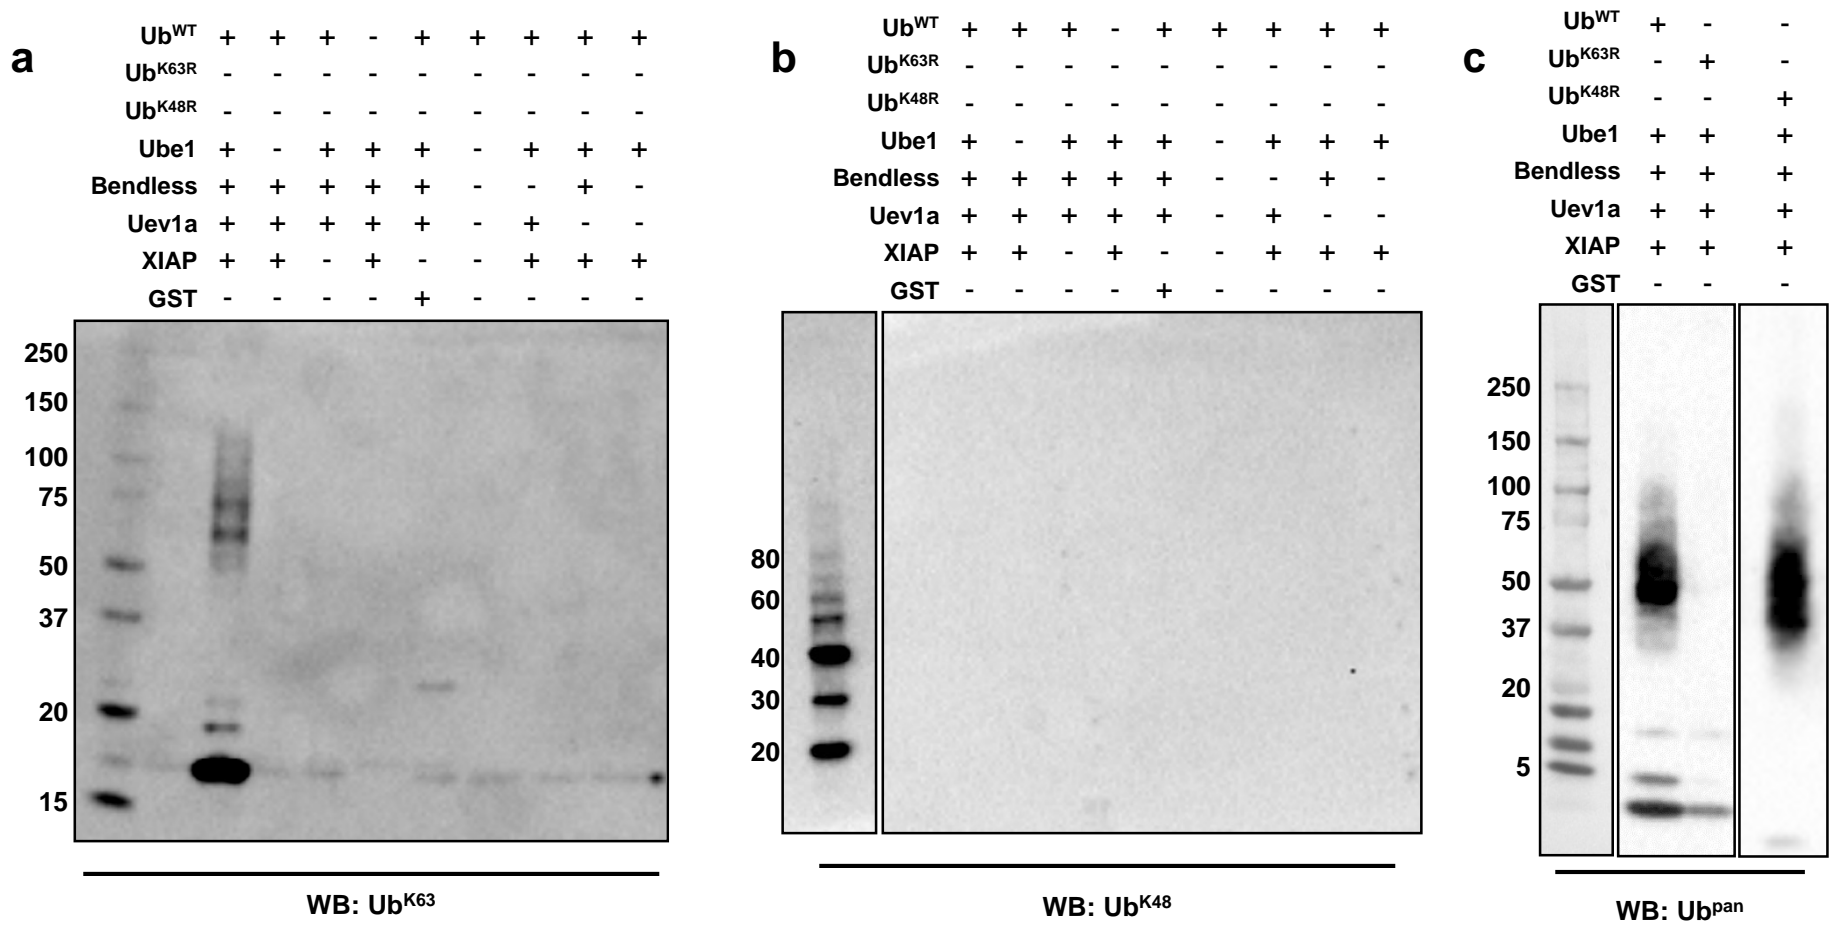

**Supplementary Figure 9 (Related to Figure 2f). Uncropped Western blot of XIAP polyubiquitylation assays.** XIAP polyubiquitylation assay with recombinant Bendless (Lane 1). Control conditions were performed in the absence of an E1 enzyme – Ube1 (Lane 2), XIAP (Lane 3, 5 and 6), wild type ubiquitin (Lane 4, 11 and 12) and Bendless (Lanes 6, 7 and 9) and Uev1a (Lanes 6, 8-9). Immunoblots (WB) were probed with antibodies specific for (a) K63 and (b) K48 polyubiquitin chains or with (c) a pan-ubiquitin antibody. GST was used as a negative control. WB shown represent one of two biological replicates.

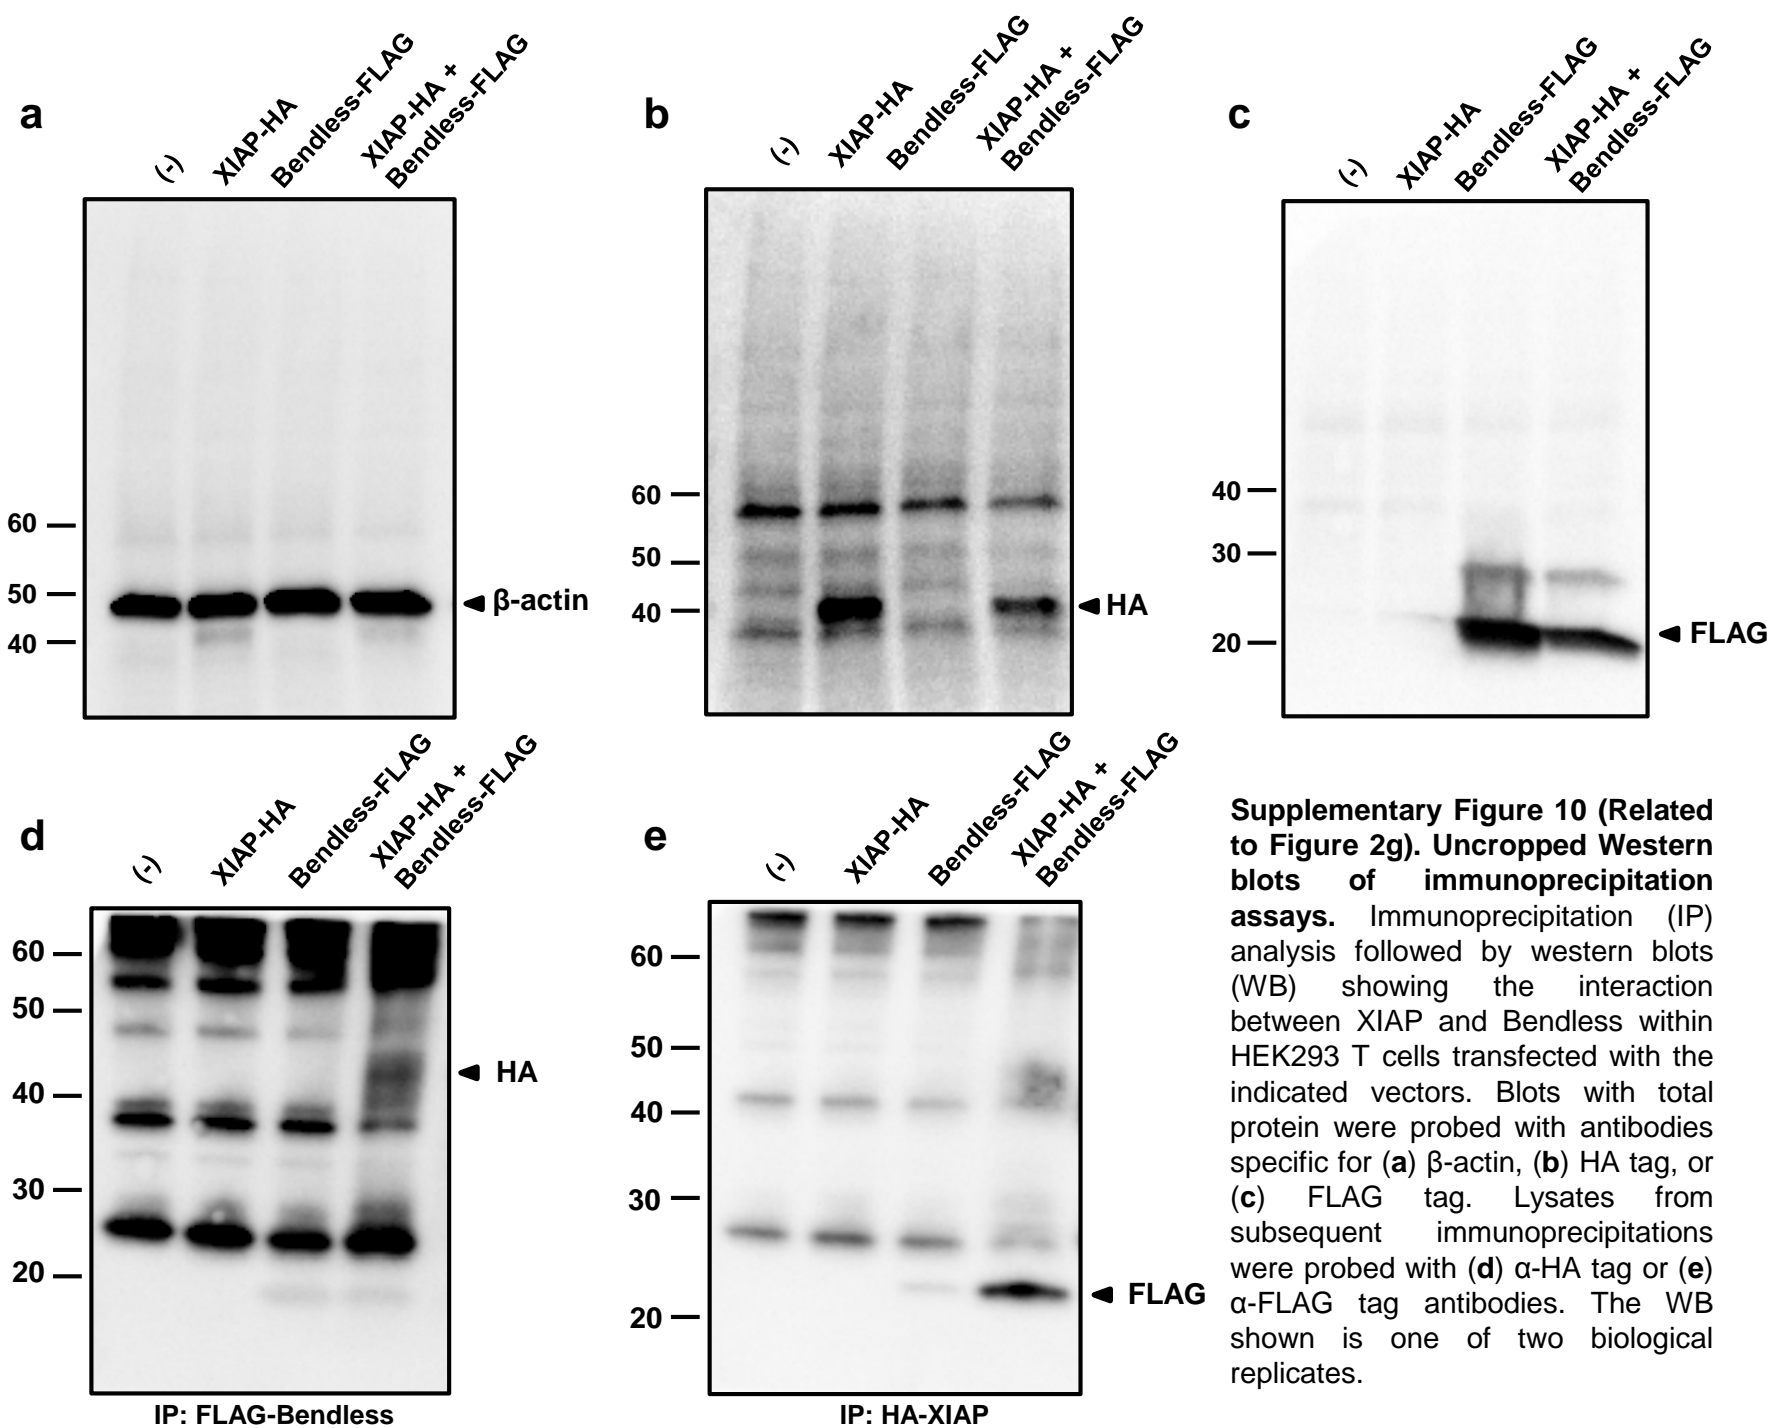

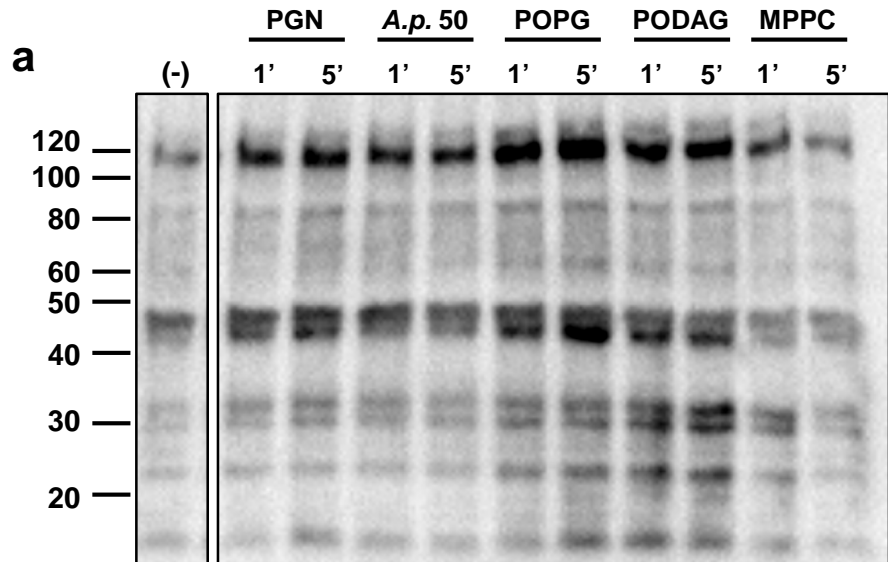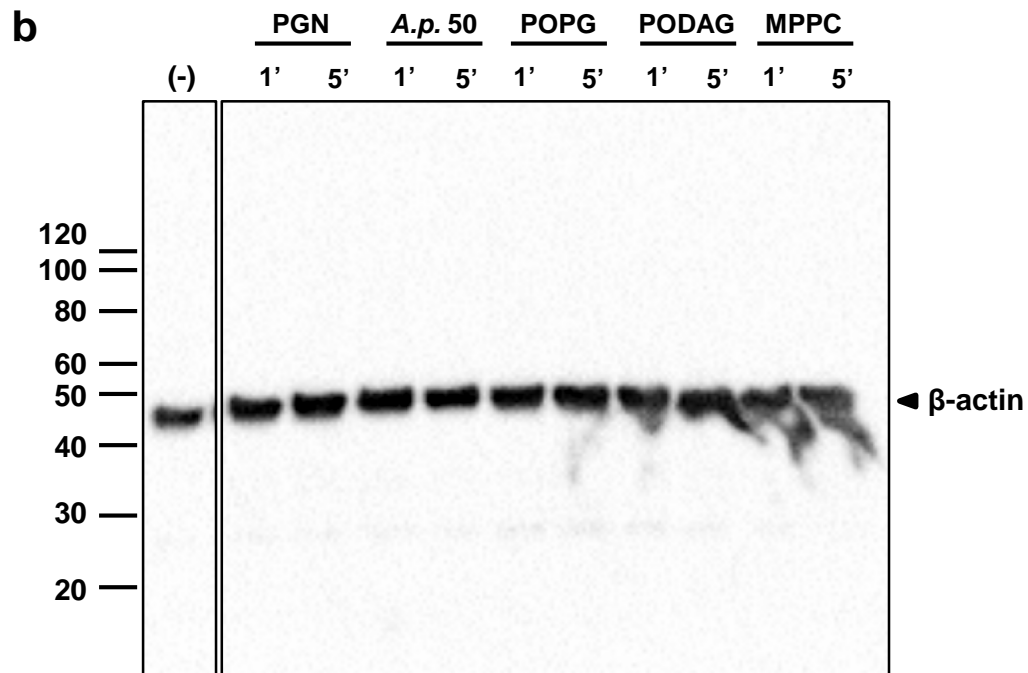

**Supplementary Figure 11 (Related to Figure 5f). Uncropped Western blots (WB) of ISE6 cells stimulated at indicated time points.** Unstimulated (-), diaminopimelic-type peptidoglycan (PGN) (10  $\mu$ g/ml), *A. phagocytophilum* (MOI 50) and indicated lipids (1 ng) at 1 and 5 minutes. Blots were probed with antibodies specific for **(a)** rabbit polyclonal  $\alpha$ -Relish or **(b)**  $\alpha$ - $\beta$ -actin. The WB shown is one of three biological replicates.

**a**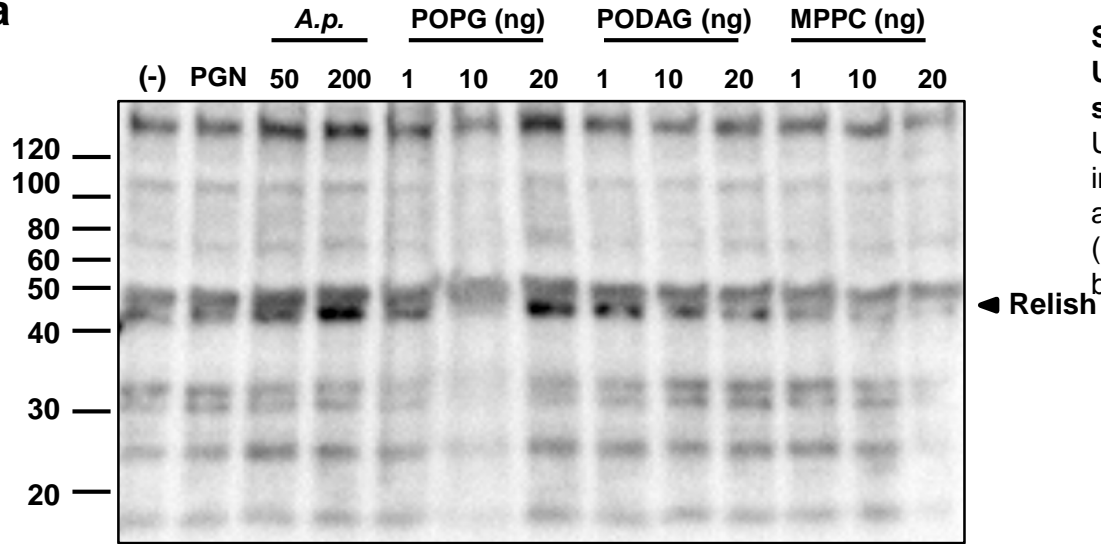

**Supplementary Figure 12 (Related to Figure 5g).  
Uncropped Western blots (WBs) of ISE6 cells  
stimulated at indicated concentrations.**  
Unstimulated (-), *A. phagocytophilum* (MOI 50) and  
indicated lipids (1 ng). Blots were probed with  
antibodies specific for (a) rabbit polyclonal  $\alpha$ -Relish or  
(b)  $\alpha$ - $\beta$ -actin. The WB shown is one of three  
biological replicates.

**b**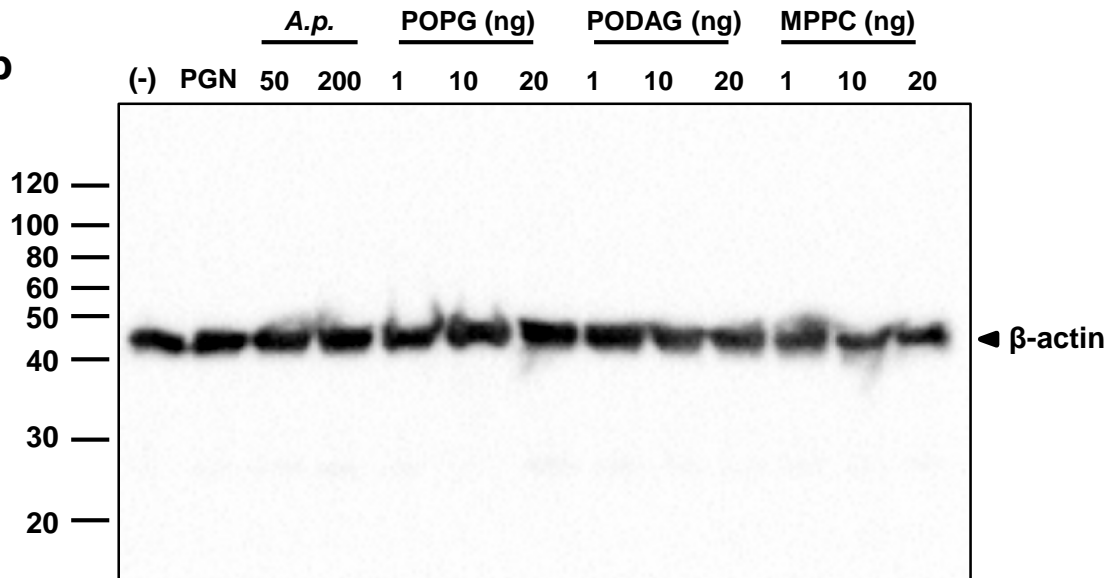

1 **Supplementary Table 1 (Related to Figure 1 and Supplementary Figure 4). The tick XIAP**  
 2 **interactome derived from the human XIAP and ML-IAP integrated network**

| Tick Name | Tick Accession | Ref Seq Protein | Human Accession | Human Name | E Value   | % Query Coverage | % Identity |
|-----------|----------------|-----------------|-----------------|------------|-----------|------------------|------------|
| UBE2Q2    | B7P1N9         | XP_002433447.1  | Q8WVN8          | UBE2Q2     | 7.00E-142 | 99               | 52         |
| CNR2      | B7P3B3         | XP_002403852.1  | P34972          | CNR2       | 1.00E-07  | 86               | 24         |
| TPH2      | B7P4Z5         | XP_002406648.1  | Q8IWU9          | TPH2       | 0.0       | 86               | 65         |
| FP6578    | B7P5P3         | XP_002407783.1  | Q6ZRI6          | FP6578     | 1.00E-04  | 29               | 39         |
| DIABLO    | B7P5Y4         | XP_002408096.1  | Q9NR28          | DIABLO     | 9.00E-16  | 63               | 28         |
| GNPTAB    | B7P614         | XP_002408193.1  | Q3T906          | GNPTAB     | 2.00E-125 | 64               | 44         |
| SLC29A1   | B7P9P6         | XP_002405059.1  | Q99808          | SLC29A1    | 2.00E-57  | 98               | 34         |
| APAF1     | B7PB18         | XP_002407629.1  | O14727          | APAF1      | 2.00E-115 | 99               | 27         |
| CSRP1     | B7PC19         | XP_002409223.1  | P21291          | CSRP1      | 4.00E-49  | 98               | 48         |
| WDYHV1    | B7PD34         | XP_002410596.1  | Q96HA8          | WDYHV1     | 8.00E-59  | 99               | 44         |
| COMMD1    | B7PDX0         | XP_002399524.1  | Q8N668          | COMMD1     | 2.00E-41  | 90               | 37         |
| IFIT3     | B7PDX5         | XP_002399529.1  | O14879          | IFIT3      | 4.00E-04  | 58               | 26         |
| XIAP      | B7PF95         | XP_002433867.1  | P98170          | XIAP       | 1.00E-26  | 84               | 26         |
| XIAP      | B7PF95         | XP_002433867.1  | Q96CA5          | BIRC7      | 5.00E-30  | 82               | 29         |
| XIAP      | B7PF95         | XP_002433867.1  | Q96P09          | BIRC8      | 1.00E-24  | 97               | 28         |
| AKT2      | B7PHG1         | XP_002402787.1  | P31751          | AKT2       | 6.00E-153 | 80               | 58         |
| GUSB      | B7PJE8         | XP_002407819.1  | P08236          | GUSB       | 1.00E-70  | 40               | 47         |
| DYNLL2    | B7PJZ9         | XP_002408929.1  | Q96FJ2          | DYNLL2     | 2.00E-65  | 100              | 96         |
| Bendless  | B7PKK7         | XP_002400703.1  | P61088          | UBE2N      | 1.00E-101 | 98               | 89         |
| Effete    | B7PKN3         | XP_002434331.1  | P51668          | UBED1      | 1.00E-101 | 100              | 87         |
| Effete    | B7PKN3         | XP_002434331.1  | P61077          | UBED3      | 4.00E-105 | 100              | 93         |
| GSPT1     | B7PLA6         | XP_002434554.1  | P15170          | GSPT1      | 0.0       | 91               | 75         |
| BIRC6     | B7PLJ5         | XP_002434643.1  | Q9NR09          | BIRC6      | 9.00E-34  | 5                | 43         |
| AIFM1     | B7PLJ7         | XP_002434645.1  | O95831          | AIFM1      | 2.00E-135 | 66               | 54         |
| SOX15     | B7PLL5         | XP_002434663.1  | O60248          | SOX15      | 6.00E-07  | 34               | 32         |
| PSPN      | B7PME5         | XP_002434943.1  | O60542          | PSPN       | 1.00E-09  | 57               | 27         |
| CHPT1     | B7PMX3         | XP_002435121.1  | Q8WUD6          | CHPT1      | 1.00E-131 | 92               | 49         |
| UBE2K     | B7PN10         | XP_002435158.1  | P61086          | UBE2K      | 3.00E-101 | 99               | 76         |
| MEKK3     | B7PND3         | XP_002435273.1  | Q9Y2U5          | MEKK3      | 3.00E-56  | 46               | 38         |
| Uev1a     | B7PP20         | XP_002435512.1  | Q13404          | UBEV1      | 4.00E-76  | 98               | 86         |
| Uev1a     | B7PP20         | XP_002435512.1  | Q15819          | UBEV2      | 1.8       | 11               | 24         |
| SERTAD1   | B7P9B6         | XP_002403854.1  | Q9UHV2          | SERTAD1    | 1.00E-04  | 29               | 42         |
| RASD2     | B7PPF1         | XP_002435643.1  | Q96D21          | RASD2      | 2.00E-42  | 92               | 41         |
| TRHDE     | B7PQN4         | XP_002436076.1  | Q9UKU6          | TRHDE      | 7.00E-145 | 86               | 31         |
| CRISPLD2  | B7PQW1         | XP_002436153.1  | Q9H0B8          | CRISPLD2   | 2.00E-21  | 41               | 30         |
| STRAP     | B7PS00         | XP_002401479.1  | Q9Y3F4          | STRAP      | 5.00E-21  | 82               | 25         |
| NOTCH1    | B7PT11         | XP_002403554.1  | P46531          | NOTCH1     | 0.0       | 98               | 46         |
| UBE2W     | B7PTB2         | XP_002404101.1  | Q96B02          | UBE2W      | 2.00E-84  | 90               | 77         |
| TGFB3     | B7PV78         | XP_002407531.1  | P10600          | TGFB3      | 1.00E-21  | 92               | 25         |



|           |         |                |        |         |           |    |    |
|-----------|---------|----------------|--------|---------|-----------|----|----|
| TAB1      | B7PWS4  | XP_002410221.1 | Q15750 | TAB1    | 2.00E-39  | 67 | 35 |
| EGR2      | B7P XK1 | XP_002401004.1 | P11161 | EGR2    | 3.00E-68  | 40 | 79 |
| SOX8      | B7PYW8  | XP_002404127.1 | P57073 | SOX8    | 3.00E-36  | 16 | 77 |
| XAF1      | B7PZ96  | XP_002404975.1 | Q6GPH4 | XAF1    | 8.00E-04  | 52 | 31 |
| ANGPTL7   | B7PZB3  | XP_002405085.1 | O43827 | ANGPTL7 | 4.00E-44  | 65 | 39 |
| PECAM1    | B7PZR6  | XP_002405927.1 | P16284 | PECAM1  | 2.00E-11  | 74 | 20 |
| HTRA2     | B7PZV8  | XP_002406208.1 | O43464 | HTRA2   | 2.00E-46  | 45 | 43 |
| TAB2      | B7Q0C5  | XP_002407435.1 | Q9NYJ8 | TAB2    | 2.00E-26  | 39 | 37 |
| UBE2E2    | B7Q173  | XP_002408959.1 | Q96LR5 | UBE2E2  | 3.00E-108 | 86 | 83 |
| CHEK1     | B7Q2N1  | XP_002410911.1 | O14757 | CHEK1   | 2.00E-49  | 58 | 35 |
| RIPK2     | D9IQE8  | ADK23790.1     | O43353 | RIPK2   | 2.00E-71  | 56 | 22 |
| BMPR2     | B7Q593  | XP_002401624.1 | Q13873 | BMPR2   | 2.00E-148 | 42 | 50 |
| CER1      | B7Q6G3  | XP_002402983.1 | O95813 | CER1    | 5.00E-10  | 32 | 31 |
| IAP2      | B7Q7F6  | XP_002403970.1 | Q13075 | BIRC1   | 6.00E-40  | 30 | 30 |
| IAP2      | B7Q7F6  | XP_002403970.1 | Q13489 | BIRC2   | 5.00E-63  | 70 | 30 |
| IAP2      | B7Q7F6  | XP_002403970.1 | Q13490 | BIRC3   | 2.00E-67  | 73 | 29 |
| SMAD6/7   | B7Q8J0  | XP_002405164.1 | O15105 | SMAD7   | 1.00E-22  | 80 | 33 |
| SMAD6/7   | B7Q8J0  | XP_002405164.1 | O43541 | SMAD6   | 4.00E-26  | 64 | 31 |
| UBE2J2    | B7Q8X9  | XP_002405482.1 | Q8N2K1 | UBE2J2  | 2.00E-82  | 65 | 62 |
| CDX4      | B7Q9V0  | XP_002406414.1 | O14627 | CDX4    | 1.00E-20  | 27 | 47 |
| Caspase-2 | B7QAN7  | XP_002412613.1 | P42575 | CASP2   | 9.00E-21  | 68 | 26 |
| Caspase-2 | B7QAN7  | XP_002412613.1 | P55211 | CASP8   | 2.00E-27  | 62 | 30 |
| Caspase-2 | B7QAN7  | XP_002412613.1 | Q14790 | CASP9   | 5.00E-30  | 60 | 29 |
| TGFBR1    | B7QAV0  | XP_002412676.1 | P36897 | TGFBR1  | 0.0       | 93 | 63 |
| ACVRL1    | B7P561  | XP_002407058.1 | P37023 | ACVRL1  | 2.00E-81  | 92 | 26 |
| BCR       | B7QB94  | XP_002412820.1 | P11274 | BCR     | 8.00E-143 | 67 | 35 |
| GZMB      | B7QD33  | XP_002413447.1 | P10144 | GZMB    | 3.00E-34  | 92 | 31 |
| USP11     | B7QDB1  | XP_002413525.1 | P51784 | USP11   | 0.0       | 90 | 41 |
| BIRC5     | B7QE45  | XP_002413809.1 | O15392 | BIRC5   | 2.00E-42  | 69 | 55 |
| Caspase   | B7QF31  | XP_002414145.1 | P42574 | CASP3   | 9.00E-59  | 83 | 40 |
| Caspase   | B7QF31  | XP_002414145.1 | P55210 | CASP7   | 3.00E-63  | 83 | 42 |
| Caspase   | B7QF31  | XP_002414145.1 | P55212 | CASP6   | 5.00E-53  | 87 | 38 |
| MAGED1    | B7QGP1  | XP_002400239.1 | Q9Y5V3 | MAGED1  | 5.00E-23  | 17 | 45 |
| MPV17     | B7QGS9  | XP_002400740.1 | P39210 | MPV17   | 8.00E-38  | 94 | 40 |
| CASP4     | B7QHN6  | XP_002414693.1 | P49662 | CASP4   | 6.00E-06  | 31 | 29 |
| DLL4      | B7QHQ8  | XP_002414716.1 | Q9NR61 | DLL4    | 3.00E-144 | 80 | 40 |
| STRADB    | B7QJ15  | XP_002415172.1 | Q9C0K7 | STRADB  | 3.00E-06  | 73 | 19 |
| MAP3K7    | B7QK24  | XP_002415531.1 | O43318 | MAP3K7  | 4.00E-75  | 60 | 84 |
| MFAP3     | B7QKH9  | XP_002415684.1 | P55082 | MFAP3   | 3.00E-08  | 19 | 38 |
| DYM       | B7QN16  | XP_002400517.1 | Q7RTS9 | DYM     | 2.00E-137 | 77 | 45 |

5 **Supplementary Table 2 Primers used**

6

| Name                                           | Target gene                 | Primer sequence                                                                |
|------------------------------------------------|-----------------------------|--------------------------------------------------------------------------------|
| <i>Anaplasma phagocytophilum</i> 16S (qRT-PCR) | NC_007797                   | F 5'-CAGCCACACTGGAAGTGAAGA-3'<br>R 5'-CCCTAAGGCCTTCCTCACTC-3'                  |
| <i>Ixodes scapularis</i> Actin (qRT-PCR)       | AF426178                    | F 5'-GGTATCGTGCTCGACTC-3'<br>R 5'-ATCAGGTAGTCGGTCAGG-3'                        |
| <i>Ixodes scapularis</i> XIAP_qPCR             | XM_002433822                | F 5'- CAGAGCAATGGACAGCCTTT-3'<br>R 5'- CTCTGGATCCCCCTTGAAC-3'                  |
| <i>Ixodes scapularis</i> Bendless_qPCR         | XM_002400659                | F 5'-CCGTTACTTTCCGCAGACTT-3'<br>R 5'-TACAAGACCGTCACGCACTC-3'                   |
| <i>Ixodes scapularis</i> Uev1a_qPCR            | XM_002435467.1              | F 5'-ATGACCTTGACCCACTGGAC-3'<br>R 5'-CTCATTGATGCCTCCCATCT-3'                   |
| <i>Ixodes scapularis</i> Caspar_qPCR           | XM_002405982.1              | F 5'-CGACATCCGAGCGGCCATTC-3'<br>R 5'-CCTCGTCCGACACGTTAGC-3'                    |
| <i>Ixodes scapularis</i> Relish_qPCR           | GBBN01020499.1 <sup>a</sup> | F 5'-AGAATGTCCGCCACCGTTTTTTTCTGC-3'<br>R 5'-CACGTGCACCGCCTCACCATGAAGG-3'       |
| <i>Ixodes scapularis</i> PGRP1_qPCR            | XM_002411731.1              | F 5'-CCAGTATCGTTCGCCACTG-3'<br>R 5'-GCTCCAATGGCACCAAAG-3'                      |
| <i>Ixodes scapularis</i> PGRP2_qPCR            | XM_002433644.1              | F 5'-GGCAAGACTACCACATGG-3'<br>R 5'- CCGATGCCATCAAAGCC -3'                      |
| <i>Ixodes scapularis</i> PGRP3_qPCR            | XM_002410377.1              | F 5'- CCGCCATGCAGCTCATC -3'<br>R 5'- GGAAGGCTTCTCCTGGG -3'                     |
| <i>Ixodes scapularis</i> PGRP4_qPCR            | XM_002413046.1              | F 5'- CGGTGTGACATGTGCCG -3'<br>R 5'- CACGTAGGGAACTCGGGC -3'                    |
| <i>Ixodes scapularis</i> MyD88_qPCR            | XM_002407328.1              | F 5'-CCTGAGCCACTGGAGC-3'<br>R 5'-CGCAAGCCGAAGAGCAC-3'                          |
| <i>Ixodes scapularis</i> JAK_qPCR              | XM_002406395.1              | F 5'-GAGTACCTGGAAGAGAAG-3'<br>R 5'-TGTGGATGTAGTAGTAGTG-3'                      |
| <i>Drosophila</i> Diptericin_qPCR              | NM_057460.4                 | F 5'-CCGCAGTACCCACTCAATCT-3'<br>R 5'-ACTGCAAAGCCAAAACCATC-3'                   |
| <i>Drosophila</i> IM1_qPCR                     | NM_137475.3                 | F 5'- TCCACTGTCGCCGATCC -3'<br>R 5'- CTTGGGTTGAAACTTCCTACTTGC -3'              |
| <i>Drosophila</i> Rp49_qPCR                    | NM_001144655.3              | F 5'- AAGCTAGCCCAACCTGGTTG -3'<br>R 5'- GTGCGCTTCTTCACGATCT -3'                |
| <i>Ixodes scapularis</i> Isc2_relish           | GBBN01020499.1 <sup>a</sup> | F 5'- AGAATGTCCGCCACCGTTTTTTTCTGC -3'<br>R 5'- GCTACTCTGGCTGAACGGGCTGAACCG -3' |
| <i>Ixodes scapularis</i> XIAP_siRNA_619        | XM_002433822                | F 5'-AAGCTACTCATCTCTCGAGGTCCTGTCTC-3'<br>R 5'-AAACCTCGAGAGATGAGTAGCCCTGTCTC-3' |
| <i>Ixodes scapularis</i> XIAP_scrambled        | N/A                         | F 5'-AAGTCGCTACAGTCCGTTACTCCTGTCTC-3'<br>R 5'-AAAGTAACGGACTGTAGCGACCCTGTCTC-3' |
| <i>Ixodes scapularis</i> Bendless_siRNA_69     | XM_002400659                | F 5'-AAGCCTAATACTACTAAATCACCTGTCTC-3'<br>R 5'-AATGATTTAGTAGTATTAGGCCCTGTCTC-3' |
| <i>Ixodes scapularis</i> Bendless_scrambled    | N/A                         | F 5'-AAAGCATCGTGTGGAGCTTTCTGTCTC-3'<br>R 5'-AATACGCATAATACTACATCCCTGTCTC-3'    |
| <i>Ixodes scapularis</i> Uev1a_siRNA_251       | XM_002435467.1              | F 5'-AAGCATCAGATTCATTTCCAACCTGTCTC-3'<br>R 5'-AATTGGAATGAATCTGATGCCCTGTCTC-3'  |
| <i>Ixodes scapularis</i> Uev1a_scrambled       | N/A                         | F 5'-AAATTCGCTTAACTACGTAACCCTGTCTC-3'<br>R 5'-AAGTTACGTAGTTAAGCGAATCCTGTCTC-3' |
| <i>Ixodes scapularis</i> Caspar_siRNA_430      | XM_002405982.1              | F 5'-AAGATCTTCTCCCCTATCTACCTGTCTC-3'<br>R 5'-AATAGATAGGGGAGGAAGATCCCTGTCTC-3'  |
| <i>Ixodes scapularis</i> Caspar_scrambled      | N/A                         | F 5'-AAGCCTCGCAGACTTAACCAACCTGTCTC-3'<br>R 5'-AATTGGTTAAGTCTGCGAGGCCCTGTCTC-3' |
| <i>Ixodes scapularis</i> Relish_siRNA_54       | GBBN01020499.1 <sup>a</sup> | F 5'-AACCTCACACCATTTGCCTTTCTGTCTC-3'<br>R 5'-AAAAAGGCAAATGGTGTGAGGCCTGTCTC-3'  |
| <i>Ixodes scapularis</i> Relish_scrambled      | N/A                         | F 5'-AAGACGCCTATCGCCTACATTCTGTCTC-3'<br>R 5'-AAAATGTAGGCGATAGGCGTCCCTGTCTC-3'  |
| <i>Ixodes scapularis</i> PGRP1_siRNA_42        | XM_002411731.1              | F 5'-AACAGTTATGTGGAACCTATCCTGTCTC-3'<br>R 5'-AAATAGGTTCCACATAACTGGCCTGTCTC-3'  |
| <i>Ixodes scapularis</i>                       | N/A                         | F 5'-AAGTGAATATCCGCATCTTACCTGTCTC-3'                                           |

|                                                 |                         |                                                                                                  |
|-------------------------------------------------|-------------------------|--------------------------------------------------------------------------------------------------|
| PGRP1_scrambled                                 |                         | R 5'-AATAAGATGCGGATATCCACCCTGTCTC-3'                                                             |
| <i>Ixodes scapularis</i><br>PGRP2_siRNA_44      | XM_002433644.1          | F 5'-AAGGAATCCATTGAGCACAACCTGTCTC-3'<br>R 5'-AATTGTGCTCAATGGAATCCCCTGTCTC-3'                     |
| <i>Ixodes scapularis</i><br>PGRP2_scrambled     | N/A                     | F 5'-AAGCTAGACGCGAACAATATTCCTGTCTC-3'<br>R 5'-AAAATATTGTTTCGCGTCTAGCCCTGTCTC-3'                  |
| <i>Ixodes scapularis</i><br>PGRP3_siRNA_151     | XM_002410377.1          | F 5'-AACCGAATGAGCGTATGATAACCTGTCTC-3'<br>R 5'-AATTATCATACGCTCATTCCGGCCTGTCTC-3'                  |
| <i>Ixodes scapularis</i><br>PGRP3_scrambled     | N/A                     | F 5'-AAGCAGTTGAAACGCGATATACCTGTCTC-3'<br>R 5'-AATATATCGCGTTTCAACTGCCCTGTCTC-3'                   |
| <i>Ixodes scapularis</i><br>PGRP4_siRNA_18      | XM_002413046.1          | F 5'-AAGCTAGGACTGTCTGTCATTCTGTCTC-3'<br>R 5'-AAAATGACAGACAGTCTAGCCCTGTCTC-3'                     |
| <i>Ixodes scapularis</i><br>PGRP4_scrambled     | N/A                     | F 5'-AAGCTGTACCGTGCTTATTGACCTGTCTC-3'<br>R 5'-AATCAATAAGCACGGTACAGCCCTGTCTC-3'                   |
| <i>Ixodes scapularis</i><br>MyD88_siRNA_273     | XM_002407328.1          | F 5'-AAGCATCTCCTCATCCAGAATCCTGTCTC-3'<br>R 5'-AAATTCTGGATGAGGAGATGCCCTGTCTC-3'                   |
| <i>Ixodes scapularis</i><br>MyD88_scrambled     | N/A                     | F 5'-AAGATCATCCCTCGATACACTCCTGTCTC-3'<br>R 5'-AAAGTGTATCGAGGGATGATCCCTGTCTC-3'                   |
| <i>Ixodes scapularis</i><br>JAK_siRNA_743       | XM_002406395.1          | F 5'-AAGCATCACTTGGACCCACATCCTGTCTC-3'<br>R 5'-AAATGTGGGTCCAAGTGATGCCCTGTCTC-3'                   |
| <i>Ixodes scapularis</i><br>JAK_scrambled       | N/A                     | F 5'-AAGCTTACACCGAACTACGTCCTGTCTC-3'<br>R 5'-AAACGTAGTTCGGTGTGAAGCCCTGTCTC-3'                    |
| <i>Anaplasma marginale msp5</i><br>(qRT-PCR)    | KP347554                | F 5'-CCGAAGTTGTAAGTGAGGG-3'<br>R 5'-CTTATCGGCATGGTCGCC-3'                                        |
| <i>Dermacentor andersoni actin</i><br>(qRT-PCR) | EF488512.2 <sup>b</sup> | F 5'-CGCCTCCTCCTCTTCTCTG-3'<br>R 5'-TGAGGTGGTCTCGTGGATG-3'                                       |
| pCMV-Bendless-FLAG                              | XM_002400659            | F 5'-GAAATTACAAGCTTATGGCCGCCTTACCTAG -3'<br>R 5'-GATTTAAGGGTACCGCGTTCTGGGCG -3'                  |
| pCMV-XIAP-HA                                    | XM_002433822            | F 5'-GATTGCAGGAATTCATGGTTGTCATCAGTATGGCG-3'<br>R 5'-GTATAGTTGCGGCCGCTCATGAAAGAAAAGCCTTAATGTTC-3' |
| pGEX-6P-Bendless                                | XM_002400659            | F 5'-GGATCCATGGCCGCTTAGGAAG-3'<br>R 5'-CTCGAGTCAGGCGTTCTGGG-3'                                   |

7 <sup>a</sup>Primers were designed based on the *relish* sequence derived from an *I. scapularis* transcriptome (NCBI  
8 project number: PRJNA230499).

9 <sup>b</sup>Primers were designed based on the *D. variabilis actin* sequence. The *D. andersoni* product was  
10 sequenced and validated as having 100% conserved primer-binding sites.

11

12

13

14

15

16

17

18 **Supplementary Table 3 (Related to Figure 5). Lipid populations unique to uninfected or *A.***  
 19 ***phagocytophilum*-infected cells with predicted identities**

| Uninfected cells<br><i>m/z</i> Observed | <i>A.p.</i> -infected cells<br><i>m/z</i> Observed | <i>A.p./Un.</i> FC>2 <sup>¶</sup><br><i>m/z</i> Observed | Predicted<br>Identity        | <i>m/z</i> Theo. |
|-----------------------------------------|----------------------------------------------------|----------------------------------------------------------|------------------------------|------------------|
|                                         | 730.530                                            |                                                          | [PC 32:1-H] <sup>-</sup>     | 730.5392         |
|                                         | 745.469                                            |                                                          | [PG 34:2-H] <sup>-</sup>     | 745.5025         |
| 746.504                                 |                                                    |                                                          |                              |                  |
|                                         |                                                    | 747.489                                                  | [PG 34:1-H] <sup>-</sup>     | 747.5182         |
| 748.504                                 |                                                    |                                                          | [PC 34:6-H] <sup>-</sup>     | 748.4923         |
|                                         | 749.513                                            |                                                          | [PG 34:0-H] <sup>-</sup>     | 749.5338         |
|                                         | 758.540                                            |                                                          | [PC 34:1-H] <sup>-</sup>     | 758.5705         |
|                                         | 759.506                                            |                                                          | [PC 34:1+1-H] <sup>-</sup> * | 759.5182         |
|                                         |                                                    | 773.519                                                  | [PG 36:2-H] <sup>-</sup>     | 773.5338         |
|                                         |                                                    | 775.542                                                  | [PG 36:1-H] <sup>-</sup>     | 775.5495         |
| 790.511                                 |                                                    |                                                          |                              |                  |
| 837.552                                 |                                                    |                                                          | [PI 34:0-H] <sup>-</sup>     | 837.5651         |
|                                         | 862.711                                            |                                                          |                              |                  |
| 889.588                                 |                                                    |                                                          | [PI 38:2-H] <sup>-</sup>     | 889.5812         |

20 <sup>¶</sup> S:N Fold Change (FC)>2, present in both; *A. phagocytophilum* (*A.p.*)/cells;

21 \*odd acyl chain PG also predicted by mass, low confidence prediction; database searched for  
 22 deprotonated ion only [M-H]<sup>-</sup>; predicted identities reported for error <50ppm.

23

24

25

26
